# Supplementary material for: Male suicide rates in German prisons and the role of citizenship
Source: PLoS One. 2017 Jun 7;12(6):e0178959. doi: 10.1371/journal.pone.0178959 (PMC5462390; doi:10.1371/journal.pone.0178959)
Supplement: S1 Table — Sheet 1—Prison Population by Nationality, Age Group, Year, and Gender. Sheet 2—Prison Suicides by Nationality, Age Group, and Gender. Sheet 3—General Population by Nationality, Age, Year, and Gender. Sheet 4 General Population by Nationality, Age, and Gender (sum of years 2000–2013). Sheet 5—Suicides in the General Population by Nationality, Age Group, and Gender. (XLSX) [file pone.0178959.s001.xlsx]

## Sheet: 1 prison population
	Prison Population by Year and Age Group
Population in detention				ACD = Adult criminal detention
				JCD = Juvenile criminal detention
				m = male, f = female, t =total
				table entries: person years spent in correctional facility
	GER citizens, ACD+JCD
		Year of census -->	2000	2001	2002	2003	2004	2005	2006	2007	2008	2009	2010	2011	2012	2013		Sum	Mean
Age group	14–17	m	579.496	539.132	555.365	537.272	485.415	463.551	477.624	488.455	409.662	400.144	408.307	358.545	350.44	320.948		6374.35	455.311
		f	23.3728	35.549	30.7379	31.1429	33.7765	26.2655	23.9923	26.0341	32.7692	24.1442	23.4886	23.4925	33.7753	18.9387		387.479	27.6771
		t	602.869	574.681	586.103	568.415	519.191	489.816	501.617	514.489	442.431	424.288	431.796	382.037	384.215	339.886		6761.83	482.988
	18–20	m	2583.87	2657.55	2588.82	2569.94	2543.96	2544.19	2408.8	2496.04	2369.4	2335.24	2278.2	2075.78	1942.26	1772.62		33166.7	2369.05
		f	80.9423	103.072	125.015	113.078	114.13	94.6209	125.639	118.567	96.0833	97.9903	68.7307	84.2051	73.3126	65.8929		1361.28	97.2343
		t	2664.82	2760.62	2713.84	2683.02	2658.09	2638.81	2534.44	2614.61	2465.49	2433.23	2346.93	2159.98	2015.58	1838.52		34528	2466.28
	21–24	m	2729.01	3006.57	3099.15	3386.07	3525.09	3547.36	3441.17	3442.4	3232.54	3354.64	3251.11	3168.77	2969.65	2660.65		44814.2	3201.01
		f	97.621	103.32	130.093	134.249	167.273	158.098	177.83	167.97	161.047	162.204	175.076	151.735	164.991	147.34		2098.85	149.918
		t	2826.63	3109.89	3229.24	3520.32	3692.36	3705.46	3619	3610.37	3393.59	3516.84	3426.19	3320.51	3134.64	2807.99		46913	3350.93
	25–29	m	5852.65	5913.38	5837.2	6404.96	6725.66	7021.6	7513.3	7618.98	7385.58	7371.92	7210.04	6966.43	6671.12	6552.78		95045.6	6788.97
		f	242.131	263.618	283.143	287.46	312.557	335.073	368.476	400.422	412.734	399.021	350.952	378.146	390.558	382.287		4806.58	343.327
		t	6094.78	6177	6120.35	6692.42	7038.22	7356.68	7881.77	8019.41	7798.32	7770.94	7560.99	7344.57	7061.68	6935.07		99852.2	7132.3
	30–39	m	11096.5	10872.5	10845.1	10901.9	10700.7	10492.3	10396	10336.2	10006.9	9824.08	9512.95	9376.38	9235.09	9174.98		142772	10198
		f	533.456	543.19	545.624	536.239	641.605	600.929	628.812	651.184	618.292	652.058	630.754	660.962	608.951	591.749		8443.8	603.129
		t	11630	11415.7	11390.7	11438.1	11342.3	11093.2	11024.8	10987.4	10625.2	10476.1	10143.7	10037.3	9844.04	9766.73		151215	10801.1
	40–49	m	6010.63	6389.96	6597.01	6964.43	7473.74	7575.69	7879.84	8029.77	7945.67	7712.94	7350.03	7117.3	6557.92	6265.41		99870.3	7133.6
		f	311.311	357.822	390.278	379.235	431.925	423.954	522.275	517.444	571.353	554.736	507.641	535.443	541.998	478.655		6524.07	466.005
		t	6321.94	6747.78	6987.29	7343.67	7905.66	7999.65	8402.11	8547.21	8517.02	8267.68	7857.68	7652.74	7099.91	6744.06		106394	7599.6
	50–59	m	2545.29	2600.24	2546.68	2719.45	2942.06	2995.97	3267.32	3373.74	3473.52	3427.96	3396.78	3366.29	3359.41	3367.45		43382.1	3098.72
		f	141.435	132.189	161.468	170.656	219.104	202.931	234.703	229.268	229.027	236.006	219.845	222.439	247.088	242.115		2888.27	206.305
		t	2686.73	2732.43	2708.15	2890.1	3161.16	3198.9	3502.02	3603	3702.55	3663.96	3616.62	3588.72	3606.5	3609.57		46270.4	3305.03
	60+	m	814.553	877.409	939.951	1029.7	1136.91	1202.46	1237.22	1323.13	1331.66	1410.2	1402.9	1398.23	1415.81	1437.89		16958	1211.29
		f	36.8961	37.9853	49.7413	52.3345	62.0401	75.5094	69.69	85.1793	79.3097	94.8891	90.3362	96.1254	89.2703	115.483		1034.79	73.9135
		t	851.449	915.394	989.693	1082.04	1198.95	1277.97	1306.91	1408.31	1410.97	1505.09	1493.24	1494.35	1505.08	1553.37		17992.8	1285.2
	JCD
	14–17	m	579.496	539.132	555.365	537.272	485.415	463.551	477.624	488.455	409.662	400.144	408.307	358.545	350.44	320.948		6374.35	455.311
		f	23.3728	35.549	30.7379	31.1429	33.7765	26.2655	23.9923	26.0341	32.7692	24.1442	23.4886	23.4925	33.7753	18.9387		387.479	27.6771
		t	602.869	574.681	586.103	568.415	519.191	489.816	501.617	514.489	442.431	424.288	431.796	382.037	384.215	339.886		6761.83	482.988
	18–20	m	2497.51	2582.61	2506.92	2500.43	2457.11	2443.59	2325.63	2380.29	2260.29	2214.99	2144.01	1967.16	1840.25	1677.78		31798.6	2271.33
		f	74.7929	93.1961	117.363	106.252	108.633	89.115	114.425	105.034	92.8462	76.9038	62.3352	77.0553	58.1685	59.5215		1235.64	88.2601
		t	2572.3	2675.8	2624.29	2606.68	2565.74	2532.71	2440.05	2485.32	2353.14	2291.89	2206.35	2044.22	1898.42	1737.3		33034.2	2359.59
	21–24	m	1968	2117.26	2219.71	2211.3	2235.48	2177.86	2131.75	2104.26	2006.05	1905.87	1759.68	1859.29	1814.31	1737.28		28248.1	2017.72
		f	59.8343	67.2549	82.8992	80.605	98.5909	96.6195	100.583	105.932	87.3846	84.9519	73.1761	86.4523	75.0562	68.5399		1167.88	83.42
		t	2027.83	2184.51	2302.61	2291.91	2334.07	2274.48	2232.33	2210.19	2093.43	1990.82	1832.85	1945.75	1889.36	1805.82		29416	2101.14
	ACD
	18–20	m	86.3668	74.9391	81.8985	69.5161	86.8513	100.592	83.1732	115.759	109.112	120.248	134.183	108.615	102.008	94.8466		1368.11	97.7221
		f	6.14935	9.87618	7.65251	6.82623	5.49723	5.50589	11.2145	13.5332	3.23713	21.0865	6.39548	7.14983	15.1441	6.37145		125.639	8.97425
		t	92.5161	84.8153	89.551	76.3424	92.3485	106.098	94.3876	129.292	112.349	141.335	140.578	115.765	117.152	101.218		1493.75	106.696
	21–24	m	2729.01	3006.57	3099.15	3386.07	3525.09	3547.36	3441.17	3442.4	3232.54	3354.64	3251.11	3168.77	2969.65	2660.65		44814.2	3201.01
		f	97.621	103.32	130.093	134.249	167.273	158.098	177.83	167.97	161.047	162.204	175.076	151.735	164.991	147.34		2098.85	149.918
		t	2826.63	3109.89	3229.24	3520.32	3692.36	3705.46	3619	3610.37	3393.59	3516.84	3426.19	3320.51	3134.64	2807.99		46913	3350.93
	non-GER; ACD+JCD
			2000	2000	2000	2000	2000	2000	2000	2000	2000	2000	2000	2000	2000	2000		Sum	Mean
	14–17	m	214.178	180.952	185.114	176.225	170.119	176.051	166.499	194.431	167.261	167.339	150.657	151.019	141.574	128.457		2369.88	169.277
		f	5.48571	8.35714	4.48276	5.57143	6.825	5.68421	5.87097	9.5	6.3	3.72414	5.58621	6.67442	3.17647	1.71429		78.9527	5.63948
		t	219.664	189.309	189.597	181.797	176.944	181.735	172.37	203.931	173.561	171.063	156.243	157.693	144.751	130.172		2448.83	174.916
	18–20	m	770.791	724.561	672.974	669.372	715.055	691.607	643.563	623.61	638.762	663.77	648.121	653.58	603.32	625.348		9344.44	667.46
		f	18.1579	13.3596	11.6011	16.5223	20.869	22.3886	7.54839	23.4874	16.1669	14.7235	10.0786	23.6179	17.0094	13.6548		229.185	16.3704
		t	788.949	737.921	684.575	685.895	735.924	713.995	651.111	647.098	654.929	678.494	658.199	677.198	620.33	639.003		9573.62	683.83
	21–24	m	1875.67	1749.85	1601.01	1663.4	1660.79	1629.16	1570.99	1494.97	1346.6	1292.65	1276.35	1302.92	1242.67	1262.3		20969.3	1497.81
		f	47.4736	35.1319	45.3004	48.8634	52.7931	37.1777	40.3279	41.8096	40.2019	43.4868	40.2235	45.3041	42.4977	43.366		603.958	43.1398
		t	1923.15	1784.98	1646.31	1712.26	1713.58	1666.33	1611.32	1536.78	1386.81	1336.14	1316.57	1348.22	1285.17	1305.67		21573.3	1540.95
	25–29	m	3282.82	2925.21	2620.04	2914.86	2811.87	2751.41	2719.99	2599.37	2401.8	2299.58	2151.36	2047.8	1952.54	1963.59		35442.2	2531.59
		f	84.187	78.3722	78.3508	83.8623	85.4634	77.4279	82.3747	73.5941	77.5796	84.7162	75.6196	82.6937	73.0664	95.0486		1132.36	80.8826
		t	3367.01	3003.58	2698.39	2998.73	2897.33	2828.84	2802.37	2672.97	2479.38	2384.29	2226.98	2130.49	2025.61	2058.64		36574.6	2612.47
	30–39	m	4210.69	4280.83	3821.78	4361.48	4476.91	4396.68	4537.96	4610.14	4403.34	4406.57	4229.22	4170.57	3944.72	3878.69		59729.6	4266.4
		f	118.202	127.563	142.379	155.621	149.353	156.576	152.61	162.446	175.669	142.358	140.194	150.199	148.682	179.065		2100.92	150.065
		t	4328.89	4408.39	3964.16	4517.1	4626.27	4553.26	4690.57	4772.58	4579.01	4548.93	4369.41	4320.77	4093.4	4057.75		61830.5	4416.46
	40–49	m	1448.14	1448.49	1333.81	1536.76	1548.04	1741.65	1832.95	1916.39	1937	2017.96	2070.63	2199.58	2219.15	2243.13		25493.7	1820.98
		f	73.1322	67.5335	69.926	69.1648	74.6767	80.0089	92.78	104.109	88.2803	87.3362	88.3645	88.6004	118.945	94.2		1197.06	85.5041
		t	1521.27	1516.02	1403.74	1605.92	1622.72	1821.66	1925.73	2020.5	2025.28	2105.3	2158.99	2288.18	2338.1	2337.33		26690.8	1906.48
	50–59	m	392.783	401.147	355.06	472.78	469.851	480.55	523.062	627.145	585.698	627.603	624.04	702.211	696.184	720.396		7678.51	548.465
		f	22.1097	25.0124	22.747	24.2077	28.2112	40.4346	39.0196	44.8745	39.2357	37.5546	32.287	48.0974	45.8789	49.2216		498.892	35.6351
		t	414.892	426.16	377.807	496.987	498.062	520.984	562.082	672.02	624.934	665.157	656.327	750.308	742.063	769.618		8177.4	584.1
	60+	m	95.9251	76.9605	79.2099	107.121	117.368	142.894	143.978	167.936	157.535	183.524	180.622	201.323	187.837	177.086		2019.32	144.237
		f	4.25187	6.66998	4.21241	5.18736	5.80819	4.30155	3.46841	7.17992	3.56688	13.1004	7.64692	11.8134	12.7441	12.7297		102.681	7.33437
		t	100.177	83.6305	83.4223	112.309	123.177	147.196	147.446	175.116	161.102	196.624	188.269	213.136	200.581	189.816		2122	151.572
	JCD
	14–17	m	95.9251	76.9605	79.2099	107.121	117.368	142.894	143.978	167.936	157.535	183.524	180.622	201.323	187.837	177.086		2019.32	144.237
		f	4.25187	6.66998	4.21241	5.18736	5.80819	4.30155	3.46841	7.17992	3.56688	13.1004	7.64692	11.8134	12.7441	12.7297		102.681	7.33437
		t	100.177	83.6305	83.4223	112.309	123.177	147.196	147.446	175.116	161.102	196.624	188.269	213.136	200.581	189.816		2122	151.572
	18–20	m	392.783	401.147	355.06	472.78	469.851	480.55	523.062	627.145	585.698	627.603	624.04	702.211	696.184	720.396		7678.51	548.465
		f	22.1097	25.0124	22.747	24.2077	28.2112	40.4346	39.0196	44.8745	39.2357	37.5546	32.287	48.0974	45.8789	49.2216		498.892	35.6351
		t	414.892	426.16	377.807	496.987	498.062	520.984	562.082	672.02	624.934	665.157	656.327	750.308	742.063	769.618		8177.4	584.1
	21–24	m	95.9251	76.9605	79.2099	107.121	117.368	142.894	143.978	167.936	157.535	183.524	180.622	201.323	187.837	177.086		2019.32	144.237
		f	4.25187	6.66998	4.21241	5.18736	5.80819	4.30155	3.46841	7.17992	3.56688	13.1004	7.64692	11.8134	12.7441	12.7297		102.681	7.33437
		t	100.177	83.6305	83.4223	112.309	123.177	147.196	147.446	175.116	161.102	196.624	188.269	213.136	200.581	189.816		2122	151.572
	ACD
	18–20	m	392.783	401.147	355.06	472.78	469.851	480.55	523.062	627.145	585.698	627.603	624.04	702.211	696.184	720.396		7678.51	548.465
		f	22.1097	25.0124	22.747	24.2077	28.2112	40.4346	39.0196	44.8745	39.2357	37.5546	32.287	48.0974	45.8789	49.2216		498.892	35.6351
		t	414.892	426.16	377.807	496.987	498.062	520.984	562.082	672.02	624.934	665.157	656.327	750.308	742.063	769.618		8177.4	584.1
	21–24	m	95.9251	76.9605	79.2099	107.121	117.368	142.894	143.978	167.936	157.535	183.524	180.622	201.323	187.837	177.086		2019.32	144.237
		f	4.25187	6.66998	4.21241	5.18736	5.80819	4.30155	3.46841	7.17992	3.56688	13.1004	7.64692	11.8134	12.7441	12.7297		102.681	7.33437
		t	100.177	83.6305	83.4223	112.309	123.177	147.196	147.446	175.116	161.102	196.624	188.269	213.136	200.581	189.816		2122	151.572

## Sheet: 2 prison suicides
	Prison Suicides by Age Group
	2000-2013
	Age group					1			2			3			4			5			6			7			8
			0–13			14–17			18–20			21–24			25–29			30–39			40–49			50–59			60+			Sum 14–59
			Study pop	Suicide SP	SR	Study Pop	Suicide SP	SR	Study Pop	Suicide SP	SR	Study pop	Suicide SP	SR	Study pop	Suicide SP	SR	Study pop	Suicide SP	SR	Study pop	Suicide SP	SR	Study Pop	Suicide SP	SR	Study pop	Suicide SP	SR	Study pop	Suicide SP	SR
	GER	male				6374.35	6	94.1272	33166.7	30	90.4522	44814.2	39	87.026	95045.6	52	54.7106	142772	114	79.8478	99870.3	69	69.0896	43382.1	46	106.034	16958	12	70.763	465425	356	76.4892
		female				387.479	0	0	1361.28	0	0	2098.85	2	95.2904	4806.58	2	41.6096	8443.8	1	11.843	6524.07	3	45.9836	2888.27	2	69.2455	1034.79	1	96.638	26510.3	10	37.7211
		total				6761.83	6	88.7333	34528	30	86.8861	46913	41	87.3958	99852.2	54	54.0799	151215	115	76.0505	106394	72	67.6727	46270.4	48	103.738	17992.8	13	72.2511	491935	366	74.4
	non-GER	male				2369.88	1	42.1963	9344.44	8	85.6125	20969.3	6	28.6132	35442.2	8	22.5719	59729.6	35	58.5974	25493.7	7	27.4578	7678.51	4	52.0934	2019.32	1	49.5216	161028	69	42.8498
		female				78.9527	0	0	229.185	0	0	603.958	0	0	1132.36	0	0	2100.92	0	0	1197.06	0	0	498.892	0	0	102.681	0	0	5841.32	0	0
		total				2448.83	1	40.8358	9573.62	8	83.563	21573.3	6	27.8122	36574.6	8	21.8731	61830.5	35	56.6064	26690.8	7	26.2263	8177.4	4	48.9153	2122	1	47.1253	166869	69	41.3498
	Study pop = Number of life years of the studied population
	Suicide SP = Suicide study population
	SR = Suicide rate
	GER = German citizenship (single or dual)
	non-GER = foreign citizenship only

## Sheet: 3 general population (years)
	General Population by Nationality, Year, Age and Gender					m=male
						f=female
						GER = German citizenship
						non-GER = no German citizenship
Data source (publicly available): Statistisches Bundesamt, www.genesis-online.de
							Translation:
Alter	Deutsche Staatsangehörigkeit		keine deutsche Staataangehörigkeit				Age	citizenship: GER		citizenship: non-GER
	m	w	m	w				m	f	m	f
31.12.2000							Year of census
unter 1 Jahr	372014	353214	20984	20342			individuals aged <1 year
1-Jährige	350988	331691	46205	44056			1-year-olds
2-Jährige	356860	338995	48298	45613			2-year-olds
3-Jährige	368062	349491	49967	47154			3-year-olds
4-Jährige	362302	342989	48500	46119			4-year-olds
5-Jährige	350815	332771	46007	44147			5-year-olds
6-Jährige	354697	335672	47432	45001			6-year-olds
7-Jährige	369421	350337	48597	46238			7-year-olds
8-Jährige	378125	360298	49453	46890			8-year-olds
9-Jährige	396088	376601	48732	46023			9-year-olds
10-Jährige	441108	418171	49490	46630			10-year-olds
11-Jährige	435033	413863	49241	46864			11-year-olds
12-Jährige	449700	426551	49585	46269			12-year-olds
13-Jährige	441777	417683	47729	44604			13-year-olds
14-Jährige	434938	413923	45023	41871			14-year-olds
15-Jährige	420350	400219	43689	40756			15-year-olds
16-Jährige	419679	398779	45044	40798			16-year-olds
17-Jährige	422748	402942	46453	41487			17-year-olds
18-Jährige	433204	412089	50429	46314			18-year-olds
19-Jährige	428390	411304	55188	52570			19-year-olds
20-Jährige	431037	413938	59386	59045			20-year-olds
21-Jährige	408118	391226	61470	62043			21-year-olds
22-Jährige	402454	386020	66118	65748			22-year-olds
23-Jährige	398157	382574	70601	70258			23-year-olds
24-Jährige	388364	375451	77951	74298			24-year-olds
25-Jährige	375544	361506	83743	78021			25-year-olds
26-Jährige	381406	369458	86746	80635			26-year-olds
27-Jährige	388644	376215	88799	82316			27-year-olds
28-Jährige	436916	421252	91697	83021			28-year-olds
29-Jährige	496682	477171	91713	81774			29-year-olds
30-Jährige	522557	502997	96590	81443			30-year-olds
31-Jährige	573746	550275	94376	78454			31-year-olds
32-Jährige	609548	585469	92450	74732			32-year-olds
33-Jährige	633823	609788	85796	68906			33-year-olds
34-Jährige	653652	629067	88126	68044			34-year-olds
35-Jährige	661627	633679	88562	66137			35-year-olds
36-Jährige	676940	651161	85297	63183			36-year-olds
37-Jährige	676649	652783	80308	58424			37-year-olds
38-Jährige	658157	636364	74112	55457			38-year-olds
39-Jährige	654205	634682	64748	50353			39-year-olds
40-Jährige	631426	614784	68486	52626			40-year-olds
41-Jährige	617848	599164	60494	47960			41-year-olds
42-Jährige	586437	569061	58805	45793			42-year-olds
43-Jährige	576534	560696	56373	43754			43-year-olds
44-Jährige	560056	546609	56810	45481			44-year-olds
45-Jährige	545533	531805	52517	46175			45-year-olds
46-Jährige	538091	527494	47712	46498			46-year-olds
47-Jährige	523237	514974	43311	44960			47-year-olds
48-Jährige	523930	515129	44126	47953			48-year-olds
49-Jährige	515364	508870	42386	44242			49-year-olds
50-Jährige	514547	508355	48126	49670			50-year-olds
51-Jährige	498098	490980	48477	46536			51-year-olds
52-Jährige	455414	450247	49351	44431			52-year-olds
53-Jährige	425410	427267	49421	41516			53-year-olds
54-Jährige	371890	375871	45658	36883			54-year-olds
55-Jährige	326747	336442	41319	33441			55-year-olds
56-Jährige	451238	460347	39201	31067			56-year-olds
57-Jährige	462439	471001	38180	28351			57-year-olds
58-Jährige	447640	459723	39675	28039			58-year-olds
59-Jährige	550404	568708	36771	25119			59-year-olds
60-Jährige	578100	603775	39325	26570			60-year-olds
61-Jährige	567674	598193	35063	22995			61-year-olds
62-Jährige	527435	560340	32576	22103			62-year-olds
63-Jährige	491215	526969	28909	19691			63-year-olds
64-Jährige	475549	518606	25496	17581			64-year-olds
65-Jährige	458572	504127	21181	15568			65-year-olds
66-Jährige	421534	470748	20484	13948			66-year-olds
67-Jährige	332740	380376	18555	12861			67-year-olds
68-Jährige	328947	382757	15167	11651			68-year-olds
69-Jährige	331057	393586	12989	10094			69-year-olds
70-Jährige	342745	417311	11988	10597			70-year-olds
71-Jährige	326002	407141	9783	9122			71-year-olds
72-Jährige	315926	405761	8649	8259			72-year-olds
73-Jährige	274518	386578	7432	7824			73-year-olds
74-Jährige	247319	392080	6746	7399			74-year-olds
75-Jährige	226420	394215	5852	7061			75-year-olds
76-Jährige	188809	373634	5367	6532			76-year-olds
77-Jährige	174770	360441	4719	5996			77-year-olds
78-Jährige	174148	363853	4345	5421			78-year-olds
79-Jährige	167295	369755	3721	4880			79-year-olds
80-Jährige	150091	348861	3400	4351			80-year-olds
81-Jährige	104464	249776	2568	3391			81-year-olds
82-Jährige	61366	152500	1849	2481			82-year-olds
83-Jährige	53400	136429	1624	1934			83-year-olds
84-Jährige	52089	139935	1572	1881			84-year-olds
85 Jahre und mehr	373358	1205688	12991	20659			individuals aged 85+
Insgesamt	36282351	38709621	3874185	3393383			total
31.12.2001
unter 1 Jahr	356136	336955	22087	20577
1-Jährige	371091	352456	24950	23650
2-Jährige	354223	334603	44555	42537
3-Jährige	360017	341945	46425	43811
4-Jährige	371145	352392	48045	45384
5-Jährige	365286	345738	46621	44550
6-Jährige	353604	335362	44148	42549
7-Jährige	357493	338250	45624	43349
8-Jährige	372419	353014	46887	44762
9-Jährige	381194	363117	47704	45487
10-Jährige	399075	379371	47164	44620
11-Jährige	444114	420874	48141	45493
12-Jährige	437304	416062	48741	46384
13-Jährige	451989	428628	49173	45886
14-Jährige	443993	419738	47511	44441
15-Jährige	437006	415952	45353	41907
16-Jährige	422430	402340	45447	41195
17-Jährige	421631	400971	46898	41445
18-Jährige	424947	405221	48288	43770
19-Jährige	435692	414980	53521	51633
20-Jährige	430764	414514	59322	58599
21-Jährige	433168	416812	63909	64866
22-Jährige	409978	393775	67301	68268
23-Jährige	404075	388480	72399	71655
24-Jährige	399835	384929	76374	75094
25-Jährige	390176	377718	82785	77873
26-Jährige	377427	363799	87595	80633
27-Jährige	383430	371692	89435	82874
28-Jährige	390810	378162	90391	83864
29-Jährige	439058	423249	92442	84234
30-Jährige	498541	479036	91531	82599
31-Jährige	524534	504752	96317	82053
32-Jährige	575597	551994	93334	78627
33-Jährige	611406	587196	90907	74716
34-Jährige	635413	611328	84347	68910
35-Jährige	655409	630740	86245	67734
36-Jährige	663379	635202	86423	65666
37-Jährige	678795	652590	82957	62557
38-Jährige	678408	654092	78202	57988
39-Jährige	659611	637616	72350	55097
40-Jährige	655111	635861	63150	50141
41-Jährige	632503	615963	66815	52349
42-Jährige	618190	600168	58970	47703
43-Jährige	586774	570045	57322	45395
44-Jährige	576733	561395	55052	43427
45-Jährige	560052	547200	55389	45221
46-Jährige	545260	532327	51153	45933
47-Jährige	537314	527858	46433	46160
48-Jährige	522285	515128	42250	44652
49-Jährige	522845	515120	43031	47581
50-Jährige	514112	508692	41294	43924
51-Jährige	512921	508055	47121	49288
52-Jährige	496361	490543	47399	46282
53-Jährige	453498	449567	48354	44138
54-Jährige	423413	426415	48536	41217
55-Jährige	369628	374927	44860	36622
56-Jährige	324540	335394	40574	33216
57-Jährige	447562	458626	38400	30766
58-Jährige	458338	469140	37431	28067
59-Jährige	443555	457901	38896	27715
60-Jährige	544478	566246	35748	24783
61-Jährige	571355	600778	38178	26113
62-Jährige	560479	594979	34133	22642
63-Jährige	520177	557122	31662	21878
64-Jährige	483718	523519	28104	19514
65-Jährige	467423	514743	24586	17388
66-Jährige	449952	499801	20419	15291
67-Jährige	412594	466195	19847	13740
68-Jährige	324858	376183	17934	12632
69-Jährige	320326	378089	14635	11424
70-Jährige	321459	388212	12520	9908
71-Jährige	331754	410911	11579	10385
72-Jährige	314370	400233	9463	8933
73-Jährige	304056	397963	8362	8130
74-Jährige	263399	378223	7160	7662
75-Jährige	236363	382470	6477	7248
76-Jährige	215165	383213	5603	6916
77-Jährige	178598	361825	5166	6367
78-Jährige	164117	347408	4517	5850
79-Jährige	162533	348872	4173	5296
80-Jährige	154961	352275	3527	4715
81-Jährige	137755	330230	3245	4208
82-Jährige	94916	234571	2467	3286
83-Jährige	55258	142003	1759	2426
84-Jährige	47661	126031	1540	1877
85 Jahre und mehr	354319	1150339	13951	21483
Insgesamt	36393642	38728404	3881034	3437229
31.12.2002
unter 1 Jahr	348161	330019	21128	19942
1-Jährige	356869	337468	23445	21765
2-Jährige	371074	352420	25909	24369
3-Jährige	355947	336249	43874	41741
4-Jährige	361838	343699	45437	43167
5-Jährige	373114	354106	47098	44682
6-Jährige	367027	347497	45441	43464
7-Jährige	355320	336971	43169	41614
8-Jährige	359498	340183	44766	42533
9-Jährige	374472	355020	45948	43919
10-Jährige	383345	365205	46873	44629
11-Jährige	401343	381395	46456	44059
12-Jährige	446207	422778	47487	44884
13-Jährige	439303	417887	48394	45951
14-Jährige	453924	430500	48922	45675
15-Jährige	445879	421410	47688	44443
16-Jährige	438909	417926	46106	42178
17-Jährige	424060	404240	46402	41836
18-Jährige	423710	403114	47603	43473
19-Jährige	427320	408110	50257	48772
20-Jährige	437928	418141	56924	56940
21-Jährige	432832	417378	62528	63704
22-Jährige	434798	419311	68557	70137
23-Jährige	411502	396078	72182	73223
24-Jährige	405547	390571	76827	75915
25-Jährige	401344	386862	79642	78161
26-Jährige	391830	379601	84954	79878
27-Jährige	379337	365744	88811	82277
28-Jährige	385396	373542	90062	84124
29-Jährige	392948	380033	90114	84745
30-Jährige	441083	425136	91550	84765
31-Jährige	500364	480800	90312	82601
32-Jährige	526460	506413	95031	82057
33-Jährige	577392	553767	91340	78210
34-Jährige	612978	588662	88715	74331
35-Jährige	636798	612629	82331	68429
36-Jährige	657088	632048	83798	67011
37-Jährige	665054	636577	83956	64968
38-Jährige	680442	653892	80208	61921
39-Jährige	679681	655270	75845	57430
40-Jährige	660707	638657	70172	54662
41-Jährige	655709	636814	61370	49767
42-Jährige	633141	616880	64964	51924
43-Jährige	618507	600752	57431	47332
44-Jährige	586888	570448	55690	45188
45-Jährige	576281	561760	53584	43097
46-Jährige	559400	547495	53886	44926
47-Jährige	544520	532536	49831	45616
48-Jährige	536282	527940	45340	45902
49-Jährige	520980	514999	41118	44339
50-Jährige	521326	514894	41993	47244
51-Jährige	512410	508260	40321	43676
52-Jährige	510869	507425	46141	48970
53-Jährige	494056	489877	46587	46003
54-Jährige	451230	448710	47502	43851
55-Jährige	420937	425375	47690	40935
56-Jährige	367085	373793	44157	36310
57-Jährige	322083	334227	39794	32962
58-Jährige	443664	456624	37735	30432
59-Jährige	453855	467121	36763	27784
60-Jährige	439001	455693	37876	27400
61-Jährige	538288	563479	34869	24397
62-Jährige	564127	597446	37233	25784
63-Jährige	552621	591413	33235	22442
64-Jährige	512363	553424	30807	21670
65-Jährige	475830	519753	27173	19278
66-Jährige	458812	510505	23812	17123
67-Jährige	440603	495020	19734	15065
68-Jährige	402899	461088	19163	13487
69-Jährige	316539	371533	17299	12408
70-Jährige	311372	373041	14062	11218
71-Jährige	311451	382189	12111	9757
72-Jährige	320365	403893	11174	10210
73-Jährige	302291	392509	9161	8807
74-Jährige	291375	389241	8089	7995
75-Jährige	251711	368778	6914	7505
76-Jährige	224868	371969	6214	7071
77-Jährige	203724	371289	5407	6796
78-Jährige	168124	349055	4971	6228
79-Jährige	153256	333443	4336	5718
80-Jährige	150685	332578	3979	5141
81-Jährige	142482	333264	3363	4568
82-Jährige	125371	310119	3124	4137
83-Jährige	85377	218533	2359	3178
84-Jährige	49124	130908	1674	2363
85 Jahre und mehr	333081	1081535	14789	22275
Insgesamt	36473792	38714937	3871087	3476864
31.12.2003
unter 1 Jahr	342374	324870	20047	19158
1-Jährige	349131	331458	21605	20651
2-Jährige	356860	339057	23311	22007
3-Jährige	370460	354331	25747	24497
4-Jährige	357145	337352	43128	41131
5-Jährige	363031	344820	44627	42493
6-Jährige	374293	355028	46042	43739
7-Jährige	368244	348561	44429	42549
8-Jährige	356718	338256	42321	40968
9-Jährige	360877	341525	43947	41715
10-Jährige	375919	356284	45066	43158
11-Jährige	384811	366498	46242	44009
12-Jährige	402902	382766	45749	43553
13-Jährige	447690	424251	46907	44353
14-Jährige	440753	419291	48005	45400
15-Jährige	455358	431996	48677	45308
16-Jährige	447325	422897	48024	44348
17-Jährige	440114	419535	46748	42399
18-Jährige	425590	406070	46836	43183
19-Jährige	425874	405785	48891	47247
20-Jährige	429076	410564	52547	53548
21-Jährige	439399	420362	59261	61432
22-Jährige	434220	419400	65381	68004
23-Jährige	435992	421250	72385	74186
24-Jährige	412672	397770	75277	76745
25-Jährige	406837	392201	78809	78300
26-Jährige	402590	388255	81047	79736
27-Jährige	393130	380876	85487	81414
28-Jährige	380877	367291	88328	83211
29-Jährige	387095	375116	88841	84496
30-Jährige	394490	381545	88742	84721
31-Jährige	442628	426593	89697	84401
32-Jährige	501820	482245	88234	82115
33-Jährige	527780	507784	92581	81392
34-Jährige	578679	554915	88812	77626
35-Jährige	614212	589775	86025	73588
36-Jährige	637704	613385	79613	67675
37-Jährige	658296	632946	80987	66218
38-Jährige	666234	637262	80866	64113
39-Jährige	681167	654587	77725	61054
40-Jährige	680122	655907	73562	56768
41-Jährige	660894	639309	68169	54098
42-Jährige	655482	637181	59579	49306
43-Jährige	632828	617326	63118	51369
44-Jährige	618117	601022	55910	46849
45-Jährige	586336	570624	54319	44772
46-Jährige	575364	561639	52246	42788
47-Jährige	558332	547407	52599	44548
48-Jährige	543140	532406	48638	45249
49-Jährige	534700	527652	44230	45580
50-Jährige	519150	514538	40128	43974
51-Jährige	519515	514428	41009	46840
52-Jährige	510265	507549	39493	43348
53-Jährige	508463	506677	45131	48504
54-Jährige	491232	488933	45736	45734
55-Jährige	448520	447493	46649	43611
56-Jährige	418181	424193	46907	40644
57-Jährige	364284	372375	43454	36087
58-Jährige	319228	332812	39082	32694
59-Jährige	439313	454511	37020	30077
60-Jährige	449064	464717	35855	27340
61-Jährige	434040	453418	36865	26948
62-Jährige	531520	560303	34065	24141
63-Jährige	556402	593877	36110	25389
64-Jährige	544353	587576	32354	22117
65-Jährige	504089	549470	29793	21368
66-Jährige	467117	515649	26321	18963
67-Jährige	449685	505792	22997	16890
68-Jährige	430406	489918	19080	14803
69-Jährige	392717	455521	18551	13224
70-Jährige	307941	366625	16679	12143
71-Jährige	301856	367256	13552	11004
72-Jährige	300785	375756	11699	9542
73-Jährige	308244	396167	10774	10044
74-Jährige	289826	384094	8816	8680
75-Jährige	278142	379723	7761	7824
76-Jährige	239599	359229	6737	7602
77-Jährige	212796	360441	6010	6945
78-Jährige	191735	358362	5175	6625
79-Jährige	157283	334965	4761	6080
80-Jährige	141999	318077	4141	5547
81-Jährige	138503	314819	3810	4990
82-Jährige	129922	313116	3194	4421
83-Jährige	112835	288401	2970	3983
84-Jährige	75867	201562	2253	3062
85 Jahre und mehr	315387	1020336	15772	23396
Insgesamt	36515946	38673905	3840068	3501752
31.12.2004
unter 1 Jahr	343334	326123	18215	17316
1-Jährige	343936	326388	20307	19415
2-Jährige	349772	332070	21703	20585
3-Jährige	357324	339510	23104	21773
4-Jährige	370961	354793	25474	24219
5-Jährige	357880	338075	42422	40441
6-Jährige	363833	345443	43555	41523
7-Jährige	375136	355819	44935	42848
8-Jährige	369256	349464	43509	41785
9-Jährige	357758	339288	41702	40314
10-Jährige	361981	342571	43203	40993
11-Jährige	377128	357381	44431	42434
12-Jährige	386038	367600	45608	43315
13-Jährige	404156	383918	45143	42938
14-Jährige	448970	425355	46349	43838
15-Jährige	442067	420573	47469	45041
16-Jährige	456867	433317	48526	45106
17-Jährige	448531	424348	47985	44347
18-Jährige	441678	421328	46783	43238
19-Jährige	427886	408886	47550	46338
20-Jährige	427780	408107	50601	51796
21-Jährige	430726	412503	54374	57491
22-Jährige	440958	422164	61311	65263
23-Jährige	435593	421247	67737	71408
24-Jährige	437416	422855	74239	76647
25-Jährige	414112	399106	76310	78322
26-Jährige	408180	393474	79075	78854
27-Jährige	403960	389234	80439	80432
28-Jährige	394667	382118	84536	81646
29-Jährige	382471	368582	86565	83165
30-Jährige	388449	376413	86914	84158
31-Jährige	395699	382981	86254	83801
32-Jährige	444042	428079	87183	83411
33-Jährige	503207	483642	85582	80888
34-Jährige	529239	509130	89606	80147
35-Jährige	579780	556107	85931	76244
36-Jährige	615343	590323	83252	72353
37-Jährige	638602	614090	76815	66516
38-Jährige	659373	633792	77957	65041
39-Jährige	666958	638098	78177	62899
40-Jährige	681497	655093	75339	60005
41-Jährige	680278	656493	71289	55874
42-Jährige	660846	639859	66065	53119
43-Jährige	655088	637651	58074	48536
44-Jährige	632155	617537	61556	50643
45-Jährige	617700	601199	54422	46077
46-Jährige	585609	570669	52940	44173
47-Jährige	574298	561489	50884	42170
48-Jährige	557243	547182	51388	43950
49-Jährige	541738	532057	47513	44788
50-Jährige	532666	527213	43035	45132
51-Jährige	517320	513989	39093	43453
52-Jährige	517248	513764	39954	46290
53-Jährige	507846	506724	38404	42841
54-Jährige	505648	505691	44048	47885
55-Jährige	488292	487857	44600	45145
56-Jährige	445704	446294	45565	43002
57-Jährige	415186	422836	45700	40077
58-Jährige	361303	370925	42343	35567
59-Jährige	316276	331291	38270	32197
60-Jährige	434798	452197	35807	29422
61-Jährige	443954	462323	34721	26659
62-Jährige	428717	450906	35745	26363
63-Jährige	524432	556971	33033	23616
64-Jährige	548366	590113	34818	24815
65-Jährige	535625	583490	30963	21546
66-Jährige	495226	545279	28600	20799
67-Jährige	458265	511112	25226	18454
68-Jährige	440104	500858	22035	16446
69-Jährige	420427	484336	18269	14364
70-Jährige	382286	449750	17705	12784
71-Jährige	299125	361310	15918	11797
72-Jährige	292330	361351	12933	10696
73-Jährige	290156	368836	11140	9225
74-Jährige	296296	388169	10295	9764
75-Jährige	277196	375463	8394	8389
76-Jährige	264891	369791	7384	7550
77-Jährige	227479	348710	6447	7361
78-Jährige	201073	348610	5712	6725
79-Jährige	179897	344736	4964	6407
80-Jährige	146633	320486	4499	5837
81-Jährige	131246	302561	3930	5361
82-Jährige	126908	296939	3606	4806
83-Jährige	117752	292969	3026	4264
84-Jährige	101082	267143	2786	3832
85 Jahre und mehr	327919	1041181	17187	25029
Insgesamt	36567171	38645698	3786456	3501524
31.12.2005
unter 1 Jahr	336706	319986	15031	14264
1-Jährige	344168	326945	18948	17952
2-Jährige	344202	326611	20334	19447
3-Jährige	349883	332208	21787	20634
4-Jährige	357494	339504	23007	21747
5-Jährige	371188	354874	25154	24071
6-Jährige	358173	338375	41516	39409
7-Jährige	364270	345812	42672	40671
8-Jährige	375841	356543	44018	42030
9-Jährige	370063	350198	42633	41009
10-Jährige	358566	340072	41022	39583
11-Jährige	362801	343412	42659	40482
12-Jährige	377961	358155	43887	41909
13-Jährige	386923	368453	45063	42738
14-Jährige	404960	384761	44617	42470
15-Jährige	449773	426224	45912	43459
16-Jährige	443221	421738	47179	44693
17-Jährige	457835	434530	48067	44901
18-Jährige	449561	425761	47641	45050
19-Jährige	443441	423603	47175	46025
20-Jährige	429145	410589	49301	50625
21-Jährige	428828	409354	52743	56297
22-Jährige	431461	413686	57286	62072
23-Jährige	441576	423115	64607	69718
24-Jährige	436242	421959	70283	74921
25-Jährige	438019	423465	76047	79315
26-Jährige	414811	399454	77355	80236
27-Jährige	408830	393724	79535	80548
28-Jährige	404466	389476	80569	81699
29-Jährige	395306	382596	84120	82506
30-Jährige	383321	369201	85838	83736
31-Jährige	389275	377278	86080	84165
32-Jährige	396692	383867	85021	83516
33-Jährige	444854	428946	85686	83060
34-Jährige	503844	484347	84144	80305
35-Jährige	529934	509846	87624	79486
36-Jährige	580155	556538	84239	75495
37-Jährige	615678	590619	81264	71787
38-Jährige	638885	614349	75136	65876
39-Jährige	659315	633989	76395	64532
40-Jährige	666530	638169	77065	62370
41-Jährige	680907	655107	74025	59504
42-Jährige	679589	656448	70158	55406
43-Jährige	660002	639635	65159	52801
44-Jährige	654032	637434	57460	48202
45-Jährige	630958	617279	60859	50343
46-Jährige	616178	600773	53865	45822
47-Jährige	584089	570251	52414	43892
48-Jährige	572541	560891	50360	41977
49-Jährige	555281	546569	50918	43745
50-Jährige	539619	531294	46951	44586
51-Jährige	530277	526419	42684	44810
52-Jährige	514727	513106	38658	43112
53-Jährige	514540	512592	39478	45970
54-Jährige	504730	505422	37999	42594
55-Jährige	502292	504282	43481	47526
56-Jährige	484670	486220	44055	44788
57-Jährige	442329	444724	44823	42564
58-Jährige	411655	421244	45070	39703
59-Jährige	357908	369249	41734	35140
60-Jährige	313002	329595	37373	31739
61-Jährige	429922	449529	34946	28924
62-Jährige	438336	459451	33947	26157
63-Jährige	422950	448125	34809	25874
64-Jährige	516833	553218	32110	23184
65-Jährige	539608	585969	33483	24236
66-Jährige	526326	578926	29898	21117
67-Jährige	486063	540554	27689	20334
68-Jährige	448863	506098	24348	18109
69-Jährige	430108	495343	21237	16090
70-Jährige	409771	478314	17575	14022
71-Jährige	371495	443354	17041	12459
72-Jährige	290099	356126	15379	11711
73-Jährige	282547	354981	12411	10401
74-Jährige	279671	362394	10848	9131
75-Jährige	283846	379372	9874	9514
76-Jährige	264118	365903	8029	8201
77-Jährige	251275	358909	7046	7330
78-Jährige	214654	337481	6177	7158
79-Jährige	188883	335406	5448	6501
80-Jährige	167823	329674	4708	6205
81-Jährige	135711	304789	4283	5650
82-Jährige	120191	285375	3720	5190
83-Jährige	114967	277663	3434	4650
84-Jährige	105471	271491	2887	4128
85 Jahre und mehr	360406	1116075	18990	27339
Insgesamt	36573460	38575386	3766501	3522648
31.12.2006
unter 1 Jahr	331216	313760	14655	13501
1-Jährige	337412	320632	15602	14852
2-Jährige	344181	327001	19162	18014
3-Jährige	344080	326505	20173	19461
4-Jährige	349712	332101	21643	20483
5-Jährige	357387	339309	22822	21499
6-Jährige	370816	354542	24603	23589
7-Jährige	358339	338535	40551	38612
8-Jährige	364743	346260	41742	39785
9-Jährige	376518	357088	43000	41096
10-Jährige	370609	350761	41839	40135
11-Jährige	359113	340636	40359	38969
12-Jährige	363469	344017	41918	39841
13-Jährige	378666	358770	43045	41193
14-Jährige	387595	369088	44280	42081
15-Jährige	405681	385521	44056	41862
16-Jährige	450675	427131	45359	43005
17-Jährige	443850	422779	46551	44314
18-Jährige	458896	435820	47513	45195
19-Jährige	451266	427990	48009	46891
20-Jährige	444576	425219	48865	49736
21-Jährige	429968	411686	51608	54496
22-Jährige	429341	410102	55420	60094
23-Jährige	431898	414319	60474	65344
24-Jährige	441862	423739	67405	72118
25-Jährige	436716	422300	71722	76337
26-Jährige	438231	423636	76967	80186
27-Jährige	415081	399582	77772	80876
28-Jährige	409221	393848	79345	80925
29-Jährige	404880	389717	80003	81783
30-Jährige	395719	383130	83143	82187
31-Jährige	383896	369882	84586	82948
32-Jährige	389904	378069	84648	83248
33-Jährige	397459	384779	83280	82470
34-Jährige	445446	429774	84149	81869
35-Jährige	504343	485080	82213	78988
36-Jährige	530441	510416	85557	78323
37-Jährige	580478	556952	82105	74309
38-Jährige	615907	590942	79313	70599
39-Jährige	638656	614443	73546	64809
40-Jährige	658721	634037	74967	63502
41-Jährige	665947	638103	75561	61523
42-Jährige	680024	654934	72746	58686
43-Jährige	678619	656241	69162	54728
44-Jährige	658756	639302	64242	52046
45-Jährige	652489	636969	56808	47577
46-Jährige	629501	616744	59936	49787
47-Jährige	614328	600192	53397	45464
48-Jährige	582194	569621	51798	43445
49-Jährige	570422	560067	49679	41588
50-Jährige	553038	545578	50300	43367
51-Jährige	537242	530230	46384	44233
52-Jährige	527520	525337	42084	44418
53-Jährige	511783	511891	38155	42692
54-Jährige	511387	511223	38952	45421
55-Jährige	501342	503935	37545	42110
56-Jährige	498658	502579	42856	47066
57-Jährige	481088	484409	43325	44206
58-Jährige	438494	442914	44206	41993
59-Jährige	407818	419445	44294	39166
60-Jährige	354148	367512	40714	34378
61-Jährige	309378	327692	36337	31003
62-Jährige	424701	446749	34093	28372
63-Jährige	432531	456513	32930	25660
64-Jährige	416924	445140	33811	25360
65-Jährige	509008	549199	30841	22656
66-Jährige	530428	581505	32209	23656
67-Jährige	516731	574060	28881	20567
68-Jährige	476421	535539	26798	19799
69-Jährige	439022	500797	23407	17652
70-Jährige	419680	489469	20409	15670
71-Jährige	398801	471866	16906	13669
72-Jährige	360779	437550	16463	12162
73-Jährige	280508	349762	14759	11402
74-Jährige	272177	347979	11864	10120
75-Jährige	268228	354346	10394	8861
76-Jährige	271141	369869	9414	9282
77-Jährige	251271	355962	7708	8045
78-Jährige	237601	347398	6722	7127
79-Jährige	201881	325139	5926	6961
80-Jährige	176598	320959	5158	6260
81-Jährige	155708	313863	4496	5982
82-Jährige	124604	288123	4115	5436
83-Jährige	109452	267201	3515	5021
84-Jährige	103245	257712	3259	4474
85 Jahre und mehr	395173	1193684	20880	29924
Insgesamt	36563757	38495200	3737409	3518540
31.12.2007
unter 1 Jahr	336274	318440	15768	15013
1-Jährige	331996	314464	15459	14223
2-Jährige	337438	320561	16003	15179
3-Jährige	344095	326914	19296	18037
4-Jährige	343860	326315	20225	19484
5-Jährige	349467	331796	21602	20409
6-Jährige	356851	338743	22529	21263
7-Jährige	370509	354351	24395	23314
8-Jährige	358788	338938	39671	37857
9-Jährige	365288	346717	40874	38918
10-Jährige	376975	357607	42225	40318
11-Jährige	371155	351255	41208	39476
12-Jährige	359697	341165	39818	38442
13-Jährige	364059	344598	41362	39402
14-Jährige	379215	359310	42405	40680
15-Jährige	388171	369722	43768	41580
16-Jährige	406388	386267	43772	41685
17-Jährige	451157	427977	45114	42786
18-Jährige	444834	424016	46579	44713
19-Jährige	460626	437857	48734	47218
20-Jährige	452424	429481	50354	50672
21-Jährige	445321	426246	51577	53449
22-Jährige	430493	412431	54603	58069
23-Jährige	429635	410596	58688	63382
24-Jährige	432149	414657	63310	67963
25-Jährige	442095	423699	69446	74052
26-Jährige	436730	422284	72977	77432
27-Jährige	438199	423541	77665	81000
28-Jährige	415024	399540	78212	81468
29-Jährige	409220	394029	79042	81075
30-Jährige	404935	389852	79416	81660
31-Jährige	396080	383685	82427	81738
32-Jährige	384203	370546	83733	82463
33-Jährige	390340	378913	83719	82702
34-Jährige	398005	385573	81906	81518
35-Jährige	445951	430532	82797	81107
36-Jährige	504731	485664	80859	78145
37-Jährige	530713	510914	83837	77609
38-Jährige	580735	557281	80720	73552
39-Jährige	615630	591056	78194	69906
40-Jährige	638209	614570	72726	64202
41-Jährige	658177	633982	73809	62903
42-Jährige	665081	637945	74516	60947
43-Jährige	678946	654631	71771	58257
44-Jährige	677262	655882	68432	54302
45-Jährige	657315	638727	63471	51762
46-Jährige	650826	636266	56100	47367
47-Jährige	627760	616030	59180	49588
48-Jährige	612253	599412	53010	45190
49-Jährige	580065	568754	51231	43236
50-Jährige	568056	559024	49146	41380
51-Jährige	550562	544458	49838	43232
52-Jährige	534548	528995	45795	44087
53-Jährige	524541	524153	41555	44110
54-Jährige	508613	510562	37722	42425
55-Jährige	508044	509657	38443	45149
56-Jährige	497645	502172	37084	41834
57-Jährige	494811	500706	42277	46578
58-Jährige	477189	482554	42761	43721
59-Jährige	434380	440966	43542	41520
60-Jährige	403806	417504	43292	38516
61-Jährige	350155	365456	39850	33797
62-Jährige	305600	325781	35501	30507
63-Jährige	419025	443883	33222	27936
64-Jährige	426424	453410	32026	25237
65-Jährige	410507	441906	32488	24805
66-Jährige	500483	544919	29826	22231
67-Jährige	520716	576553	31198	23177
68-Jährige	506790	568750	28011	20114
69-Jährige	466360	529954	25893	19343
70-Jährige	428847	495049	22591	17242
71-Jährige	408854	483111	19662	15356
72-Jährige	387327	464733	16346	13370
73-Jährige	349302	430249	15827	11887
74-Jährige	270488	343173	14139	11109
75-Jährige	261329	340573	11370	9834
76-Jährige	256507	345651	9985	8615
77-Jährige	258026	359802	9036	9005
78-Jährige	237636	344639	7359	7810
79-Jährige	223350	335000	6460	6935
80-Jährige	188775	311880	5650	6751
81-Jährige	163853	305853	4921	6051
82-Jährige	143099	296768	4289	5785
83-Jährige	113786	270397	3925	5225
84-Jährige	98538	248424	3326	4811
85 Jahre und mehr	424862	1253861	23217	33089
Insgesamt	36548184	38414258	3726108	3529287
31.12.2008
unter 1 Jahr	332937	316643	17301	16469
1-Jährige	336757	319029	16597	15822
2-Jährige	331930	314369	15850	14646
3-Jährige	337151	320253	16194	15457
4-Jährige	343773	326650	19265	18079
5-Jährige	343483	325994	20116	19368
6-Jährige	348863	331170	21244	20087
7-Jährige	356416	338402	22318	21121
8-Jährige	370453	354253	24087	23138
9-Jährige	359237	339353	38745	37149
10-Jährige	365717	347149	39971	38143
11-Jährige	377396	358049	41608	39706
12-Jährige	371672	351637	40577	38982
13-Jährige	360191	341562	39286	37941
14-Jährige	364583	345019	40801	38947
15-Jährige	379749	359828	41978	40170
16-Jährige	388839	370552	43591	41172
17-Jährige	406881	387133	43462	41096
18-Jährige	452014	429103	45183	42920
19-Jährige	446474	425894	47590	46001
20-Jährige	461638	439079	51066	50606
21-Jährige	452892	430258	52824	53535
22-Jährige	445552	426562	54220	56063
23-Jährige	430571	412647	57336	59882
24-Jährige	429592	410514	60510	64492
25-Jährige	432129	414155	64140	68292
26-Jährige	441761	423048	69664	73874
27-Jährige	436317	421687	72825	76833
28-Jährige	437719	423067	77052	80222
29-Jährige	414799	399372	76650	80586
30-Jährige	408929	393913	77130	79738
31-Jährige	404745	389953	77449	80335
32-Jährige	396072	383969	79979	80405
33-Jährige	384209	371091	81451	80919
34-Jährige	390559	379423	81170	81231
35-Jährige	398088	386083	79449	80097
36-Jährige	446061	430915	80034	79771
37-Jährige	504804	485786	78223	76789
38-Jährige	530721	511106	80961	76314
39-Jährige	580356	557298	78398	72289
40-Jährige	614908	590811	75978	68858
41-Jährige	637364	614310	70861	63244
42-Jährige	657041	633517	71800	61898
43-Jährige	663809	637415	72442	59955
44-Jährige	677514	653970	69822	57382
45-Jährige	675647	655100	66616	53563
46-Jährige	655434	637817	61848	51086
47-Jährige	648764	635316	54606	46776
48-Jährige	625576	614929	57561	48989
49-Jährige	609862	598222	51562	44772
50-Jährige	577579	567447	49851	42725
51-Jährige	565465	557805	47708	40851
52-Jährige	547752	543045	48484	42674
53-Jährige	531429	527520	44578	43646
54-Jährige	521257	522583	40452	43620
55-Jährige	505111	508886	36686	41934
56-Jährige	504300	507796	37374	44600
57-Jährige	493759	500179	36122	41221
58-Jährige	490554	498579	41318	45892
59-Jährige	472716	480337	41801	43051
60-Jährige	429836	438649	42402	40764
61-Jährige	399237	415118	42076	37715
62-Jährige	345758	363072	38672	33102
63-Jährige	301452	323550	34335	29838
64-Jährige	413120	440664	32099	27272
65-Jährige	419942	449994	30665	24567
66-Jährige	403751	438390	31141	24150
67-Jährige	491535	540101	28734	21694
68-Jährige	510907	571097	29956	22564
69-Jährige	496141	562841	26828	19559
70-Jährige	455805	523815	24824	18787
71-Jährige	418192	488710	21620	16718
72-Jährige	397582	476059	18809	14873
73-Jährige	375229	456921	15599	12946
74-Jährige	337065	422152	15081	11469
75-Jährige	260048	335944	13412	10684
76-Jährige	250124	332289	10764	9471
77-Jährige	244242	336149	9482	8262
78-Jährige	244224	348536	8540	8640
79-Jährige	223441	332348	6990	7498
80-Jährige	208666	321386	6064	6607
81-Jährige	175079	297223	5349	6474
82-Jährige	150836	289288	4634	5755
83-Jährige	130545	278441	4040	5471
84-Jährige	102739	251532	3676	4931
85 Jahre und mehr	446077	1295170	25282	35847
Insgesamt	36509444	38306991	3674839	3511082
31.12.2009
unter 1 Jahr	324466	308141	16657	15887
1-Jährige	334053	317780	18443	17520
2-Jährige	336824	319216	17189	16281
3-Jährige	331906	314379	16303	15052
4-Jährige	337065	320151	16546	15749
5-Jährige	343656	326479	19365	18231
6-Jährige	343097	325624	20092	19211
7-Jährige	348708	331034	21233	20108
8-Jährige	356757	338638	22108	21055
9-Jährige	370938	354544	23967	22882
10-Jährige	359889	339989	38038	36443
11-Jährige	366404	347798	39471	37638
12-Jährige	378030	358749	40920	39143
13-Jährige	372413	352392	40091	38436
14-Jährige	360868	342204	38920	37463
15-Jährige	365330	345774	40487	38530
16-Jährige	380655	360975	41955	39839
17-Jährige	389517	371590	43636	40771
18-Jährige	408041	388470	44022	41483
19-Jährige	453636	430883	46753	44725
20-Jährige	447509	427266	50248	49455
21-Jährige	462266	440072	54052	53953
22-Jährige	453410	430739	55799	56517
23-Jährige	445872	426924	57168	58377
24-Jährige	430829	412825	59500	61676
25-Jährige	429699	410431	62160	65534
26-Jährige	432056	413764	64814	68713
27-Jährige	441772	422754	69840	73669
28-Jährige	436342	421641	72266	76456
29-Jährige	437833	423135	76086	79455
30-Jährige	415067	399439	75263	79602
31-Jährige	409325	394318	75589	78475
32-Jährige	405218	390461	75744	79135
33-Jährige	396678	384575	78026	78998
34-Jährige	384729	371792	79285	79538
35-Jährige	391134	380167	78890	79741
36-Jährige	398644	386673	77246	78825
37-Jährige	446567	431441	77744	78522
38-Jährige	505240	486179	75748	75312
39-Jährige	530652	511348	78841	75158
40-Jährige	580158	557443	76423	71180
41-Jährige	614593	590848	74136	67910
42-Jährige	636836	614120	68985	62184
43-Jährige	656268	633140	69895	60950
44-Jährige	662787	637063	70604	59057
45-Jährige	676128	653403	68163	56571
46-Jährige	674047	654391	64867	52898
47-Jährige	653690	636935	60024	50435
48-Jährige	646680	634388	52974	46234
49-Jährige	623379	613857	55961	48285
50-Jährige	607525	597019	50015	44296
51-Jährige	575059	566232	48506	42267
52-Jährige	562590	556424	46444	40399
53-Jährige	544804	541525	47084	42331
54-Jährige	528185	525879	43426	43197
55-Jährige	517751	520944	39298	43000
56-Jährige	501498	507119	35624	41379
57-Jährige	500233	505860	36332	43960
58-Jährige	489616	498032	35030	40580
59-Jährige	485976	496370	40138	45172
60-Jährige	467763	477854	40485	42190
61-Jährige	425102	436247	41053	39891
62-Jährige	394393	412591	40810	36914
63-Jährige	341243	360687	37364	32416
64-Jährige	297129	321198	33118	29146
65-Jährige	406859	437354	30662	26597
66-Jährige	413162	446210	29416	23826
67-Jährige	396751	434473	29865	23491
68-Jährige	482141	535033	27530	21038
69-Jährige	500235	565172	28780	21914
70-Jährige	484863	556416	25559	18964
71-Jährige	444673	517251	23712	18194
72-Jährige	406840	481819	20551	16138
73-Jährige	385667	468515	17851	14359
74-Jährige	362768	448593	14732	12459
75-Jährige	324444	413574	14230	11017
76-Jährige	249180	327808	12593	10264
77-Jährige	238458	323375	10115	9081
78-Jährige	231458	325691	8899	7912
79-Jährige	230146	336167	7955	8249
80-Jährige	208902	318885	6497	7133
81-Jährige	193705	306473	5679	6294
82-Jährige	161015	281523	5024	6138
83-Jährige	137609	271641	4306	5436
84-Jährige	117862	258842	3768	5163
85 Jahre und mehr	467814	1335120	27538	38326
Insgesamt	36471080	38200258	3632526	3498393
31.12.2010
unter 1 Jahr	330050	314624	17241	16318
1-Jährige	325869	309403	18009	17333
2-Jährige	334348	318063	19346	18361
3-Jährige	336928	319395	17867	16998
4-Jährige	331918	314421	16927	15701
5-Jährige	337029	320129	17106	16237
6-Jährige	343471	326237	19568	18493
7-Jährige	343154	325679	20264	19488
8-Jährige	349095	331278	21317	20289
9-Jährige	357241	339082	22135	21053
10-Jährige	371456	355028	23884	22961
11-Jährige	360679	340694	37771	36245
12-Jährige	367240	348625	39175	37289
13-Jährige	378940	359659	40676	38843
14-Jährige	373273	353259	39914	38125
15-Jährige	361813	343127	38880	37249
16-Jährige	366500	346928	40939	38501
17-Jährige	381564	362119	42416	39652
18-Jährige	390780	373154	44785	41462
19-Jährige	409953	390554	46199	43819
20-Jährige	454912	432526	50522	49139
21-Jährige	448485	428410	54453	53986
22-Jährige	462939	440892	58394	57794
23-Jährige	453991	431451	60684	60180
24-Jährige	446296	427280	61758	61899
25-Jährige	431084	412758	63706	64348
26-Jährige	429846	410171	65749	67853
27-Jährige	432148	413604	67402	70512
28-Jährige	441901	422823	72042	74966
29-Jährige	436570	421867	74011	77225
30-Jährige	438105	423475	77472	80047
31-Jährige	415729	400061	76195	79683
32-Jährige	409872	395162	76029	78601
33-Jährige	405890	391323	76130	79014
34-Jährige	397426	385435	78059	78858
35-Jährige	385638	372680	79043	79231
36-Jährige	391932	380995	78933	79318
37-Jährige	399365	387316	76720	78332
38-Jährige	447401	432087	77089	77975
39-Jährige	505471	486723	75602	74993
40-Jährige	530684	511737	78611	74842
41-Jährige	580109	557751	76318	70904
42-Jährige	614181	590920	73891	67539
43-Jährige	636268	614189	68898	61917
44-Jährige	655437	632962	69743	60674
45-Jährige	661677	636764	70282	58807
46-Jährige	674839	653000	67898	56414
47-Jährige	672443	653595	64565	52706
48-Jährige	651809	636147	59766	50230
49-Jährige	644667	633390	52635	46091
50-Jährige	621160	612704	55534	48117
51-Jährige	604961	595772	49681	44164
52-Jährige	572390	564994	48110	42139
53-Jährige	559621	554906	46129	40252
54-Jährige	541619	539994	46677	42051
55-Jährige	524701	524248	42977	42950
56-Jährige	514107	519149	38974	42675
57-Jährige	497575	505302	35183	41028
58-Jährige	496064	503834	35803	43658
59-Jährige	485085	495908	34577	40217
60-Jährige	481101	493940	39432	44533
61-Jährige	462512	475248	39785	41614
62-Jährige	420229	433556	40156	39296
63-Jährige	389359	409940	39804	36335
64-Jährige	336265	358133	36347	31852
65-Jährige	292651	318677	31984	28422
66-Jährige	400235	433737	29695	25999
67-Jährige	405835	442299	28384	23266
68-Jährige	389398	430357	28928	22947
69-Jährige	472299	529617	26668	20513
70-Jährige	488958	558764	27743	21433
71-Jährige	473194	549577	24613	18509
72-Jährige	432893	510185	22768	17795
73-Jährige	395080	474384	19741	15713
74-Jährige	373078	460199	17024	13971
75-Jährige	349577	439527	14051	12063
76-Jährige	311333	403902	13563	10614
77-Jährige	237879	319045	11953	9889
78-Jährige	226339	313370	9641	8734
79-Jährige	218294	314286	8413	7618
80-Jährige	215409	322955	7495	7910
81-Jährige	194147	304430	6111	6854
82-Jährige	178390	290511	5339	6032
83-Jährige	147370	264652	4742	5828
84-Jährige	124568	253002	4062	5160
85 Jahre und mehr	501343	1379165	29884	41310
Insgesamt	36443435	38109221	3668990	3529956
31.12.2011
unter 1 Jahr	321764	305963	15727	14878
1-Jährige	333210	317529	14599	13898
2-Jährige	329412	312495	14176	13496
3-Jährige	338581	322079	14906	14125
4-Jährige	339181	321371	14920	14276
5-Jährige	332744	315154	15302	14138
6-Jährige	337518	320721	14963	14066
7-Jährige	344943	327824	17106	16080
8-Jährige	345227	327825	17152	16440
9-Jährige	352134	334058	17506	16425
10-Jährige	361067	341584	18027	17093
11-Jährige	375184	356588	20189	19220
12-Jährige	362838	343167	34389	33145
13-Jährige	369415	351317	35872	34155
14-Jährige	380804	362338	37197	35505
15-Jährige	374974	355627	36514	34792
16-Jährige	363619	345414	35910	33708
17-Jährige	367966	349404	37215	34803
18-Jährige	382127	363878	38173	35300
19-Jährige	390037	373451	38548	36486
20-Jährige	407843	390092	41394	40299
21-Jährige	452577	432334	45308	44661
22-Jährige	445573	427750	48831	47874
23-Jährige	460468	440202	52392	51886
24-Jährige	452598	432291	54160	53544
25-Jährige	444418	428037	54947	55356
26-Jährige	427773	412287	56721	57734
27-Jährige	427171	410600	58397	61046
28-Jährige	429212	413411	60362	64000
29-Jährige	438087	422565	64773	68510
30-Jährige	431795	421068	66306	71471
31-Jährige	429688	421411	69553	73986
32-Jährige	408417	399573	68641	73714
33-Jährige	402986	394553	69247	73377
34-Jährige	399403	391040	70160	73565
35-Jährige	389790	384161	70755	73957
36-Jährige	378314	371486	71354	73769
37-Jährige	384071	379525	72022	74790
38-Jährige	391939	386094	69867	73473
39-Jährige	434958	427538	69490	72093
40-Jährige	491465	481715	67870	69683
41-Jährige	513549	504724	68195	68450
42-Jährige	563213	551105	66742	64721
43-Jährige	597287	584610	64417	61590
44-Jährige	621565	609483	59856	56390
45-Jährige	642831	629789	60807	55885
46-Jährige	648305	633305	60653	54370
47-Jährige	663253	650725	58971	52135
48-Jährige	661644	650818	55271	47869
49-Jährige	641900	633522	50870	45837
50-Jährige	636858	631327	44828	41451
51-Jährige	613011	608804	45307	42370
52-Jährige	600034	595963	41042	38329
53-Jährige	565849	563538	39463	36497
54-Jährige	552852	553470	38082	35005
55-Jährige	534208	537900	38763	36444
56-Jährige	517337	523001	35078	37429
57-Jährige	506206	517328	31417	37421
58-Jährige	489687	503218	28209	36214
59-Jährige	487220	500934	29249	38329
60-Jährige	477157	493624	28217	35129
61-Jährige	471159	489255	33040	39499
62-Jährige	454630	473242	33809	36937
63-Jährige	411614	430137	34788	34892
64-Jährige	381091	405921	34830	32599
65-Jährige	328974	354491	31599	28659
66-Jährige	284301	314567	27482	25128
67-Jährige	389404	428807	26313	22895
68-Jährige	394845	436760	24770	20325
69-Jährige	377805	423378	24798	19443
70-Jährige	458393	522580	22581	17376
71-Jährige	473530	550022	23428	18099
72-Jährige	458723	542624	20890	15605
73-Jährige	418357	501679	18893	14352
74-Jährige	380530	466061	16114	12707
75-Jährige	356834	449232	13811	10770
76-Jährige	333078	429248	11421	9162
77-Jährige	295182	391984	10686	7933
78-Jährige	224424	309014	9100	7270
79-Jährige	212084	302345	7018	6376
80-Jährige	203050	301329	5599	5215
81-Jährige	198512	308517	4877	5169
82-Jährige	178526	289289	3741	4282
83-Jährige	161373	273037	3048	3814
84-Jährige	131822	246396	2509	3326
85 Jahre und mehr	495764	1413621	9162	17194
Insgesamt	36039262	37946244	3190685	3151709
31.12.2012
unter 1 Jahr	329500	312669	16487	15755
1-Jährige	323019	307197	18431	17201
2-Jährige	333591	317856	16943	15920
3-Jährige	329602	312723	16241	15434
4-Jährige	338723	322176	16774	16000
5-Jährige	339243	321461	16703	15916
6-Jährige	332714	315119	16716	15375
7-Jährige	337661	320848	16386	15360
8-Jährige	345412	328196	18222	17111
9-Jährige	345880	328379	18214	17393
10-Jährige	352797	334569	18465	17331
11-Jährige	361664	342118	18961	17966
12-Jährige	375839	357215	21247	20118
13-Jährige	363973	344276	34770	33486
14-Jährige	370696	352377	36067	34417
15-Jährige	382240	363561	37610	35670
16-Jährige	376622	357111	37359	35088
17-Jährige	365082	346790	36799	34052
18-Jährige	369819	351228	39506	36498
19-Jährige	385044	366397	42129	39500
20-Jährige	391982	375496	44677	42674
21-Jährige	409233	391646	48404	46764
22-Jährige	453678	433582	53281	51661
23-Jährige	446608	428718	57872	55652
24-Jährige	461346	440878	61480	59049
25-Jährige	453221	432644	62965	60299
26-Jährige	444790	428208	63450	61536
27-Jährige	428088	412614	64562	63201
28-Jährige	427580	411009	65635	65738
29-Jährige	429763	413964	66577	68035
30-Jährige	438678	423249	70391	72019
31-Jährige	432547	421920	71429	74559
32-Jährige	430600	422578	73784	76677
33-Jährige	409323	400783	72913	75865
34-Jährige	404074	395794	72772	75171
35-Jährige	400454	392124	73470	75370
36-Jährige	390878	385178	73952	75559
37-Jährige	379434	372465	74439	75426
38-Jährige	385299	380444	74328	76220
39-Jährige	392418	386985	72677	74896
40-Jährige	435359	428303	72150	73479
41-Jährige	491585	482300	70841	70828
42-Jährige	513579	505121	70678	69750
43-Jährige	563043	551457	69234	65707
44-Jährige	596859	584789	66679	62782
45-Jährige	620796	609429	61917	57585
46-Jährige	641745	629574	62634	56831
47-Jährige	647139	632774	62102	55230
48-Jährige	661890	650072	60419	53026
49-Jährige	659851	650051	56542	48594
50-Jährige	639913	632551	52054	46581
51-Jährige	634383	630303	46068	42077
52-Jährige	610366	607657	46389	42948
53-Jährige	597259	594546	41885	38849
54-Jährige	562898	562156	40144	36907
55-Jährige	549526	551881	38823	35484
56-Jährige	530665	536151	39301	36742
57-Jährige	513559	521137	35409	37564
58-Jährige	502112	515370	31588	37511
59-Jährige	485229	501043	28260	36264
60-Jährige	482517	498536	29049	38155
61-Jährige	472115	491040	28045	34967
62-Jährige	465715	486408	32806	39238
63-Jährige	448899	470368	33207	36625
64-Jährige	405970	427127	34233	34584
65-Jährige	375498	402878	34030	32163
66-Jährige	323667	351491	30777	28320
67-Jährige	279518	311742	26811	24803
68-Jährige	382105	424612	25654	22581
69-Jährige	386916	432344	24177	20028
70-Jährige	369767	418641	24103	19135
71-Jährige	447782	516083	21895	17096
72-Jährige	461523	542580	22729	17782
73-Jährige	445788	534664	20155	15317
74-Jährige	405601	493354	18181	14096
75-Jährige	367604	457380	15463	12383
76-Jährige	343381	439469	13245	10483
77-Jährige	318936	418507	10867	8898
78-Jährige	281190	380763	10155	7695
79-Jährige	212316	298708	8622	6984
80-Jährige	199162	290803	6629	6138
81-Jährige	189108	288254	5220	4981
82-Jährige	183423	292946	4570	4937
83-Jährige	163232	272596	3481	4108
84-Jährige	146163	254660	2805	3616
85 Jahre und mehr	532761	1437355	10334	18437
Insgesamt	36017528	37862519	3363448	3280251
31.12.2013
unter 1 Jahr	330416	313903	19866	18885
1-Jährige	331224	314270	19844	18999
2-Jährige	323287	307540	21419	20078
3-Jährige	333783	318037	19695	18596
4-Jährige	329750	312915	19017	17968
5-Jährige	338849	322293	19302	18563
6-Jährige	339182	321375	18835	17945
7-Jährige	332882	315261	18771	17406
8-Jährige	338004	321217	18191	17145
9-Jährige	346054	328744	19810	18731
10-Jährige	346432	328965	19808	18849
11-Jährige	353291	335014	20070	18791
12-Jährige	362187	342580	20507	19402
13-Jährige	376415	357752	22697	21422
14-Jährige	365067	345244	35683	34204
15-Jährige	371988	353452	36992	35175
16-Jährige	383862	364966	39010	36452
17-Jährige	378118	358500	38829	35753
18-Jährige	366844	348357	41309	36780
19-Jährige	372592	353624	46266	41628
20-Jährige	386897	368200	49970	47051
21-Jährige	393488	376867	53079	50046
22-Jährige	410402	392814	57463	54040
23-Jährige	454444	434299	64280	60183
24-Jährige	447369	429351	68132	63656
25-Jährige	461799	441073	71829	66632
26-Jährige	453488	432867	72598	66900
27-Jährige	445031	428415	72445	67529
28-Jährige	428418	412965	72946	68631
29-Jährige	427948	411554	72870	70488
30-Jährige	430205	414567	73050	72111
31-Jährige	439212	424226	75998	75713
32-Jährige	433311	422922	76266	77557
33-Jährige	431552	423742	78645	79339
34-Jährige	410233	402047	76998	78275
35-Jährige	405063	397036	76509	77438
36-Jährige	401264	393271	77313	77299
37-Jährige	391885	386268	77133	77442
38-Jährige	380597	373444	77224	77186
39-Jährige	385760	381479	77678	77816
40-Jährige	392592	387795	75581	76533
41-Jährige	435548	429009	75091	75010
42-Jährige	491620	482831	73525	72228
43-Jährige	513370	505638	73270	71058
44-Jährige	562676	551764	71558	67202
45-Jährige	596234	584938	69113	64085
46-Jährige	619887	609397	64038	58727
47-Jährige	640708	629216	64140	57788
48-Jährige	645731	632232	63651	56196
49-Jährige	660223	649447	61910	53933
50-Jährige	657867	649277	57749	49553
51-Jährige	637662	631583	53180	47282
52-Jährige	631779	629028	47061	42857
53-Jährige	607643	606302	47151	43598
54-Jährige	594128	593044	42653	39461
55-Jährige	559575	560538	40635	37473
56-Jährige	545949	550030	39225	35905
57-Jährige	526884	534228	39608	37044
58-Jährige	509364	519076	35537	37806
59-Jährige	497555	513141	31638	37681
60-Jährige	480512	498632	28192	36304
61-Jährige	477311	495981	28870	38015
62-Jährige	466745	488302	27879	34841
63-Jährige	459946	483242	32307	38987
64-Jährige	442824	467096	32621	36343
65-Jährige	400122	423830	33326	34093
66-Jährige	369460	399567	33121	31635
67-Jährige	317958	348220	30086	27966
68-Jährige	274131	308660	26153	24414
69-Jährige	374338	420022	25055	22238
70-Jährige	378526	427405	23489	19707
71-Jährige	361057	413358	23466	18827
72-Jährige	436354	509106	21205	16782
73-Jährige	448651	534573	21966	17415
74-Jährige	432185	525725	19459	15064
75-Jährige	392022	484359	17492	13767
76-Jährige	353850	447617	14833	12050
77-Jährige	328949	428607	12681	10226
78-Jährige	303989	406598	10328	8667
79-Jährige	266348	368245	9658	7449
80-Jährige	199536	287267	8103	6741
81-Jährige	185891	278223	6212	5893
82-Jährige	174882	273771	4866	4785
83-Jährige	167651	275911	4183	4705
84-Jährige	147597	254426	3184	3882
85 Jahre und mehr	575442	1461689	11662	19858
Insgesamt	35981865	37770362	3575058	3440178
__________
Bis 1989: Früheres Bundesgebiet
Ab 2011: Ergebnisse auf Grundlage des Zensus 2011.
(C)opyright Statistisches Bundesamt, Wiesbaden 2015
Stand: 03.12.2015 / 15:37:02

## Sheet: 4 general population (sum)
	General Population 2000 - 2013 by Nationality, Year, Age and Gender
Underlying raw data source publicly available at: Statistisches Bundesamt, www.genesis-online.de
SUM 2000-2013
	GER		non-GER		total
Age group	m	f	m	f	m	f
> 1-year-olds	4735348	4495310	251194	238305	9230658	489499
1-year-olds	4769723	4526710	292444	277337	9296433	569781
2-year-olds	4804002	4560857	324198	306533	9364859	630731
3-year-olds	4857819	4614019	351579	332770	9471838	684349
4-year-olds	4894867	4646829	378908	359507	9541696	738415
5-year-olds	4923172	4672999	404247	384745	9596171	788992
6-year-olds	4944139	4690908	426684	405714	9635047	832398
7-year-olds	4982496	4727684	450450	428758	9710180	879208
8-year-olds	5040336	4784363	473444	451788	9824699	925232
9-year-olds	5113742	4853714	494917	472114	9967456	967031
10-year-olds	5224936	4957326	515075	490886	10182262	1005961
11-year-olds	5330116	5055575	536807	511352	10385691	1048159
12-year-olds	5441084	5161067	559608	532676	10602151	1092284
13-year-olds	5535910	5251146	580208	551348	10787056	1131556
14-year-olds	5609639	5322407	595694	565117	10932046	1160811
15-year-olds	5680379	5392986	599073	565942	11073365	1165015
16-year-olds	5745591	5456341	608221	567768	11201932	1175989
17-year-olds	5799054	5512858	616575	569642	11311912	1186217
18-year-olds	5872045	5587609	634650	589379	11459654	1224029
19-year-olds	5958231	5679318	666810	638853	11637549	1305663
20-year-olds	6033511	5763212	715177	710185	11796723	1425362
21-year-olds	6067301	5805154	765590	776723	11872455	1542313
22-year-olds	6085257	5829228	823965	841604	11914485	1665569
23-year-olds	6080382	5831900	888805	905334	11912282	1794139
24-year-olds	6022117	5785070	947206	958017	11807187	1905223
25-year-olds	5957193	5725955	998251	1000842	11683148	1999093
26-year-olds	5880919	5660306	1039712	1034200	11541225	2073912
27-year-olds	5821138	5610282	1073414	1064527	11431420	2137941
28-year-olds	5818549	5610145	1103443	1089971	11428694	2193414
29-year-olds	5892660	5682950	1123807	1108077	11575610	2231884
30-year-olds	5991874	5783021	1143336	1120257	11774895	2263593
31-year-olds	6137468	5928135	1156262	1122912	12065603	2279174
32-year-olds	6311756	6101347	1160077	1116258	12413103	2276335
33-year-olds	6516899	6300882	1155303	1099856	12817781	2255159
34-year-olds	6743680	6518327	1148249	1079388	13262007	2227637
35-year-olds	6998221	6760639	1139844	1057547	13758860	2197391
36-year-olds	7272874	7023255	1127870	1032392	14296129	2160262
37-year-olds	7550391	7290272	1108510	1003689	14840663	2112199
38-year-olds	7819338	7547328	1081731	971027	15366666	2052758
39-year-olds	8084838	7811112	1049666	933325	15895950	1982991
40-year-olds	8317489	8044882	1022080	898851	16362371	1920931
41-year-olds	8525011	8253877	986974	860324	16778888	1847298
42-year-olds	8655260	8390090	951424	821204	17045350	1772628
43-year-olds	8717343	8463426	916566	783349	17180769	1699915
44-year-olds	8740837	8499660	883414	749625	17240497	1633039
45-year-olds	8699977	8474986	848267	721520	17174963	1569787
46-year-olds	8614486	8410891	809776	697620	17025377	1507396
47-year-olds	8489875	8309298	772457	677468	16799173	1449925
48-year-olds	8343198	8186295	736552	660862	16529493	1397414
49-year-olds	8181277	8052577	699586	642611	16233854	1342197
50-year-olds	8003416	7899913	671004	632000	15903329	1303004
51-year-olds	7808886	7727318	645377	621079	15536204	1266456
52-year-olds	7591863	7534077	626405	610284	15125940	1236689
53-year-olds	7346742	7317085	613375	600947	14663827	1214322
54-year-olds	7069082	7069953	597587	586251	14139035	1183838
55-year-olds	6756674	6794365	581769	571824	13551039	1153593
56-year-olds	6601577	6674238	565975	556657	13275815	1122632
57-year-olds	6467998	6572938	550024	539829	13040936	1089853
58-year-olds	6334908	6474045	535788	521877	12808953	1057665
59-year-olds	6317290	6496925	522953	499432	12814215	1022385
60-year-olds	6335283	6558474	513767	477223	12893757	990990
61-year-olds	6352202	6623757	503698	452537	12975959	956235
62-year-olds	6328385	6653126	491425	426397	12981511	917822
63-year-olds	6271866	6652797	475715	401579	12924663	877294
64-year-olds	6200929	6645145	452774	371274	12846074	824048
65-year-olds	6124708	6635881	422774	341346	12760589	764120
66-year-olds	6044454	6631294	393201	312186	12675748	705387
67-year-olds	5898398	6555304	364320	285203	12453702	649523
68-year-olds	5792815	6527710	335527	260910	12320525	596437
69-year-olds	5724290	6542533	308586	238294	12266823	546880
70-year-olds	5560413	6465392	281828	218986	12025805	500814
71-year-olds	5367766	6362139	255286	200992	11729905	456278
72-year-olds	5175896	6267776	229058	183858	11443672	412916
73-year-olds	4860394	6047781	204071	167822	10908175	371893
74-year-olds	4501778	5801437	178548	151626	10303215	330174
75-year-olds	4133764	5554956	155495	136920	9688720	292415
76-year-olds	3766044	5319592	135152	123813	9085636	258965
77-year-olds	3421585	5095046	117323	112134	8516631	229457
78-year-olds	3100712	4880778	101641	101862	7981490	203503
79-year-olds	2797007	4679415	88445	92952	7476422	181397
80-year-olds	2512290	4477415	75449	84551	6989705	160000
81-year-olds	2246164	4238275	64064	75866	6484439	139930
82-year-olds	1953449	3894839	54538	67471	5848288	122009
83-year-olds	1670607	3529874	46412	60043	5200481	106455
84-year-olds	1403828	3162064	39301	52506	4565892	91807
85 Jahre und mehr	5903706	17384819	251639	374166	23288525	625805
Insgesamt	509380917	537153004	51588394	48292796	1046533921	99881190
		Age group	0–13	14–17	18–20	21–24	25–29	30–39	40–49	50–59	60+	60–69	70–79	80+
	GER	m	70597690	22834663	17863787	24255057	29370459	69427339	85284753	70298436	119448733	61073330	42685359	15690044
		f	66998507	21684592	17030139	23251352	28289638	67064318	83085982	70560857	159187619	66026021	56474312	36687286
		total	137596197	44519255	34893926	47506409	57660097	136491657	168370735	140859293	278636352	127099351	99159671	52377330
	non-GER	m	6039763	2419563	2016637	3425566	5338627	11270848	8627096	5910257	6540037	4261787	1746847	531403
		f	5743833	2268469	1938417	3481678	5297617	10536651	7513434	5740180	5772517	3566949	1490965	714603
		total	11783596	4688032	3955054	6907244	10636244	21807499	16140530	11650437	12312554	7828736	3237812	1246006

## Sheet: 5 suicides general population
	Suicides in the General Population
General Population: Number of suicides / individuals in each age group
Study pop = Study population; Suicide SP = suicides in the Study population; SR = suicide rate; GER = individuals with German citizenship; non-GER = individuals without German citizenship
2000-2013
		0–13			14–17			18–20			21–24			25–29			30–39			40–49			50–59			60+			Total
		Study pop	Suicide SP	SR	Study pop	Suicide SP	SR	Study pop	Suicide SP	SR	Study pop	Suicide SP	SR	Study pop	Suicide SP	SR	Study pop	Suicide SP	SR	Study pop	Suicide SP	SR	Study pop	Suicide SP	SR	Study pop	Suicide SP	SR	Study pop	Suicide SP	SR
non-GER	m	5703826	5	0.0876605	2304992	47	2.03905	1913213	142	7.42207	3321560	283	8.52009	5385717	469	8.70822	11468500	1026	8.94624	8556642	894	10.448	5923147	692	11.683	6591289		0	44577597	3558	7.98159
	f	5358734	3	0.0559834	2130754	40	1.87727	1813015	50	2.75784	3371876	91	2.69879	5325789	112	2.10297	10600002	370	3.49057	7389743	293	3.96496	5672309	278	4.901	5377749		0	41662222	1237	2.96912
	total	11062560	8	0.072316	4435746	87	1.96134	3726228	192	5.15266	6693436	374	5.58756	10711506	581	5.42407	22068502	1396	6.32576	15946385	1187	7.44369	11595456	970	8.36535	11969038		0	86239819	4795	5.56008
GER	m	70591943	114	0.161492	22839209	1002	4.38719	17852912	2118	11.8636	24260371	3433	14.1506	29372173	4496	15.307	69454877	12373	17.8144	85294917	19836	23.2558	70296259	18298	26.0298	124375558	40479	32.5458	389962661	61670	15.8143
	f	66987235	52	0.0776267	21688501	399	1.83968	17852912	488	2.73345	23259069	772	3.31914	28300664	1061	3.74903	67087598	3137	4.67598	83095544	5848	7.03768	70562807	5921	8.39111	97415293	18330	18.8163	378834330	17678	4.66642
	total	137579178	166	0.120658	44527710	1401	3.14636	35705824	2606	7.29853	47519440	4205	8.84901	57672837	5557	9.63539	136542475	15510	11.3591	168390461	25684	15.2526	140859066	24219	17.1938	221790851	58809	26.5155	768796991	79348	10.3211
